# Supplementary material for: Support Vector Regression Modelling of an Aerobic Granular Sludge in Sequential Batch Reactor
Source: MDPI journal article supplement (doi:10.3390/membranes11080554), 2021-07-22
Supplement: s1 [file s1]

Table 1 Normalized data set for SBR30°C

| Day | COD                |                    | TOC                | TP                 | TN                 | AN                 | Biomass    |
|-----|--------------------|--------------------|--------------------|--------------------|--------------------|--------------------|------------|
|     | Influent<br>(mg/L) | Effluent<br>(mg/L) | Influent<br>(mg/L) | Influent<br>(mg/L) | Influent<br>(mg/L) | Influent<br>(mg/L) | MLSS (g/L) |
| 1   | 0.5                | 0.652              | 0.666              | 0.5                | 0.666              | 0.5                | 0.2404     |
| 3   | 0.5                | 1                  | 0.666              | 0.5                | 0.666              | 0.5                | 0.139      |
| 6   | 0.5                | 0.507              | 0.666              | 0.5                | 0.666              | 0.5                | 0.050      |
| 9   | 0.5                | 0.420              | 0.666              | 0.5                | 0.666              | 0.5                | 0.088      |
| 12  | 0.5                | 0.615              | 0.666              | 1                  | 0.666              | 0                  | 0          |
| 15  | 0.5                | 0.253              | 1                  | 1                  | 1                  | 0                  | 0.075      |
| 18  | 0                  | 0.326              | 1                  | 1                  | 1                  | 0                  | 0.151      |
| 21  | 0                  | 0.239              | 1                  | 1                  | 1                  | 0                  | 0.227      |
| 24  | 0                  | 0.202              | 1                  | 1                  | 1                  | 0                  | 0.405      |
| 27  | 0                  | 0.130              | 1                  | 0                  | 0.944              | 0                  | 0.443      |
| 30  | 0                  | 0.086              | 1                  | 0                  | 0.944              | 0.5                | 0.481      |
| 33  | 0                  | 0.072              | 0                  | 0                  | 0.944              | 0.5                | 0.531      |
| 36  | 0                  | 0.086              | 0                  | 0                  | 0.944              | 0.5                | 0.594      |
| 39  | 0                  | 0.108              | 0                  | 0                  | 0.944              | 0.5                | 0.556      |
| 42  | 1                  | 0.072              | 0                  | 0.5                | 0.962              | 0.5                | 0.607      |
| 45  | 1                  | 0.057              | 0.444              | 0.5                | 0.962              | 1                  | 0.645      |
| 48  | 1                  | 0.036              | 0.444              | 0.5                | 0.962              | 1                  | 0.683      |
| 51  | 1                  | 0.043              | 0.444              | 0.5                | 0.962              | 1                  | 0.759      |
| 54  | 1                  | 0.014              | 0.444              | 0.5                | 1                  | 1                  | 0.848      |
| 57  | 1                  | 0.007              | 0.444              | 0.5                | 1                  | 1                  | 0.974      |
| 60  | 1                  | 0                  | 0.444              | 0.5                | 1                  | 1                  | 1          |
